# Supplementary material for: Detection of plasmid contigs in draft genome assemblies using customized Kraken databases
Source: PubMed Central journal article supplement — Microb Genom. 2021 Apr 7;7(4):000550. doi: 10.1099/mgen.0.000550 (PMC8208688; doi:10.1099/mgen.0.000550), 2021-04-07
Supplement: mgen-7-0550-s001.pdf [file mgen-7-0550-s001.pdf]

## Supplementary Figures

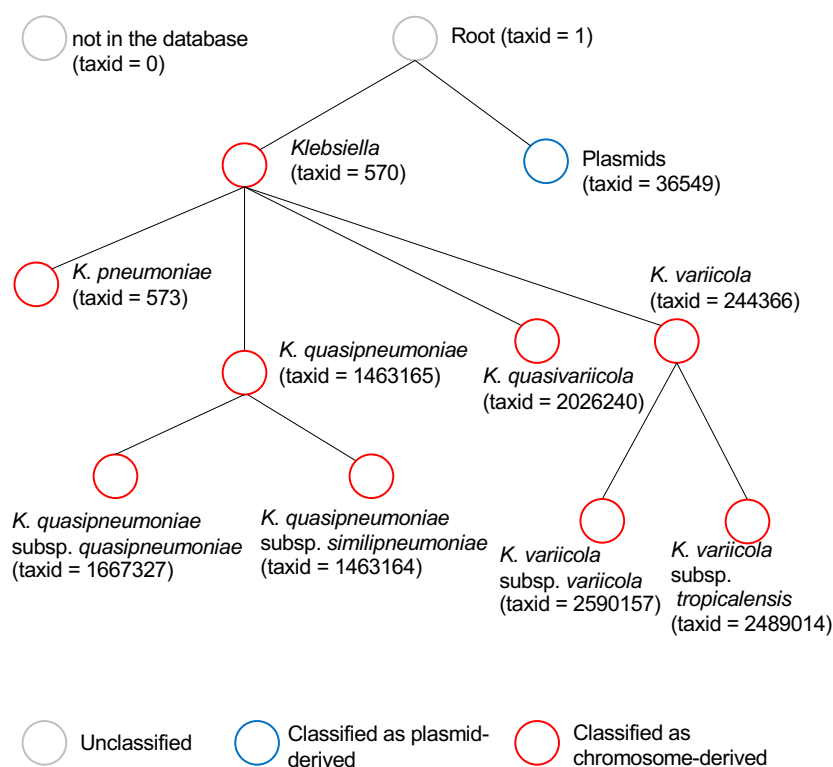

**Figure S1.** The taxonomic tree used in the Kraken analysis. This is a taxonomy tree from the NCBI taxonomy downloaded by “kraken-build --download-taxonomy --db database”. Although there are other taxa in the tree, they are not shown here because no chromosomal sequences other than *Klebsiella* spp. were included in the database. One of the taxonomic IDs in the tree was assigned to each contig. Contigs with a taxonomic ID 0 or 1 were labeled as unclassified, those with an ID 36549 were classified as plasmid-derived, and those with the remaining IDs were classified as chromosome-derived. Note that the taxon *Klebsiella variicola* subsp. *tropicalensis* has been renamed to *K. variicola* subsp. *tropica*, but has not yet been updated in NCBI (<https://www.sciencedirect.com/science/article/pii/S0923250819300956>).

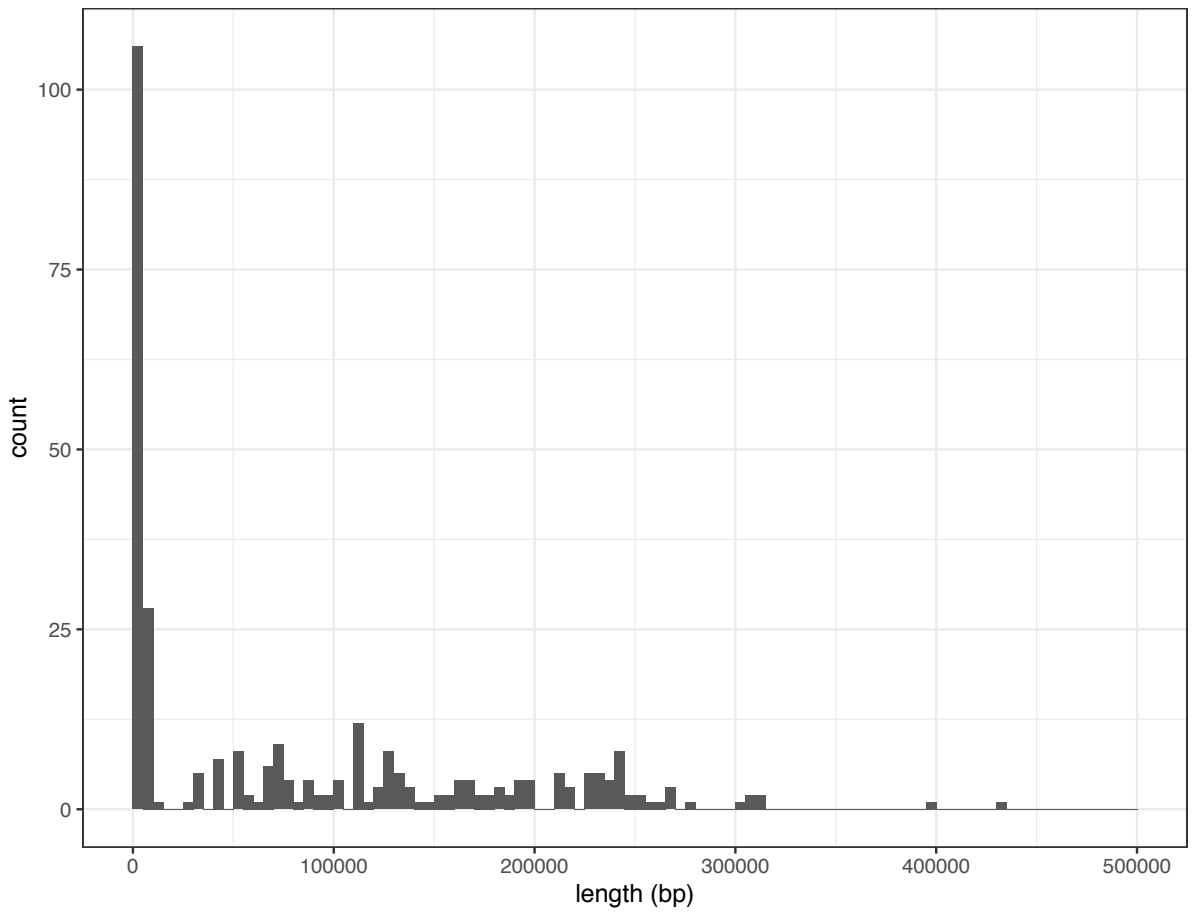

**Figure S2.** Length distribution of the completed plasmids (n=301).

Sensitivity (contig length)

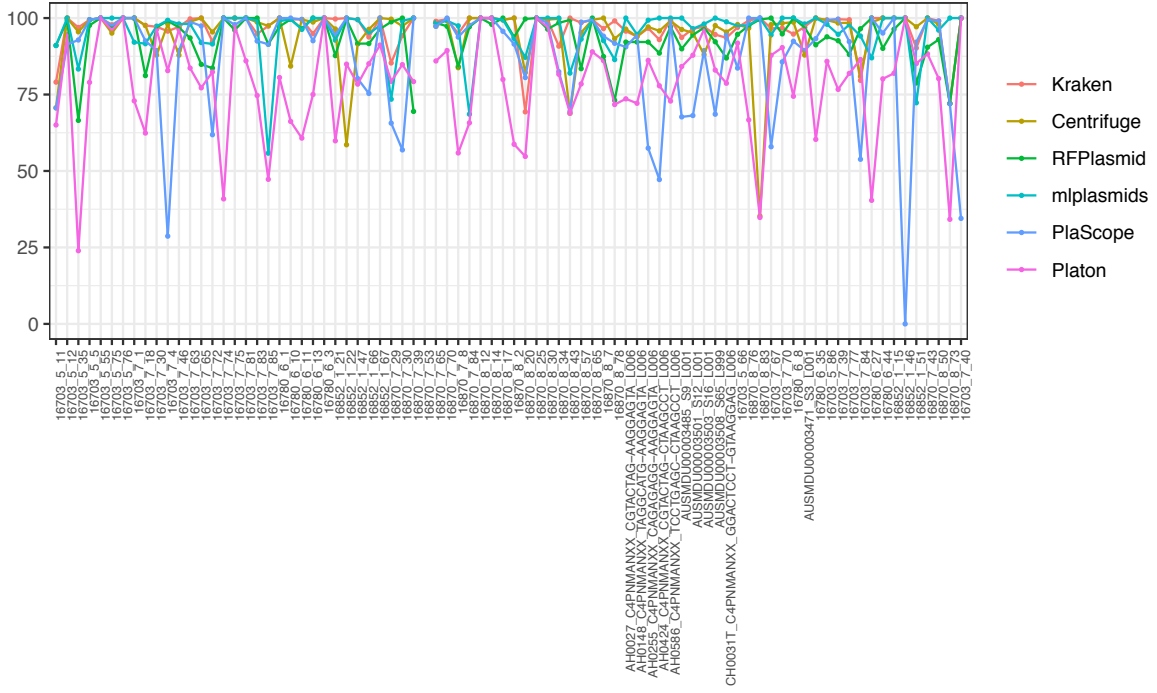

Sensitivity (contig number)

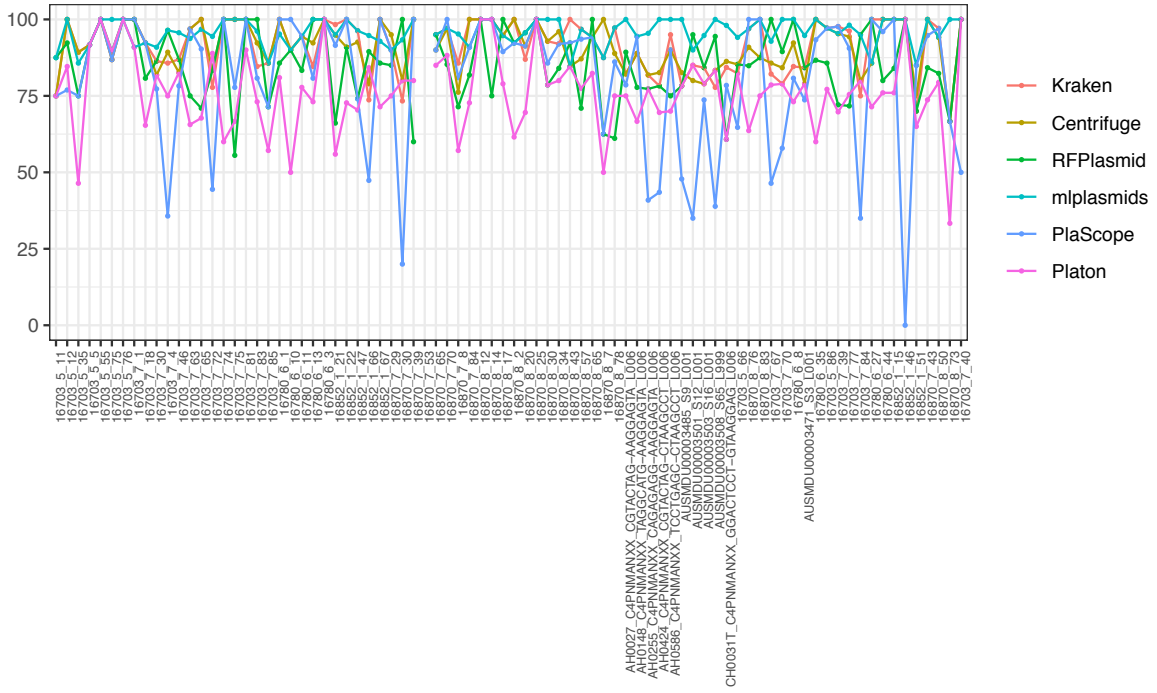

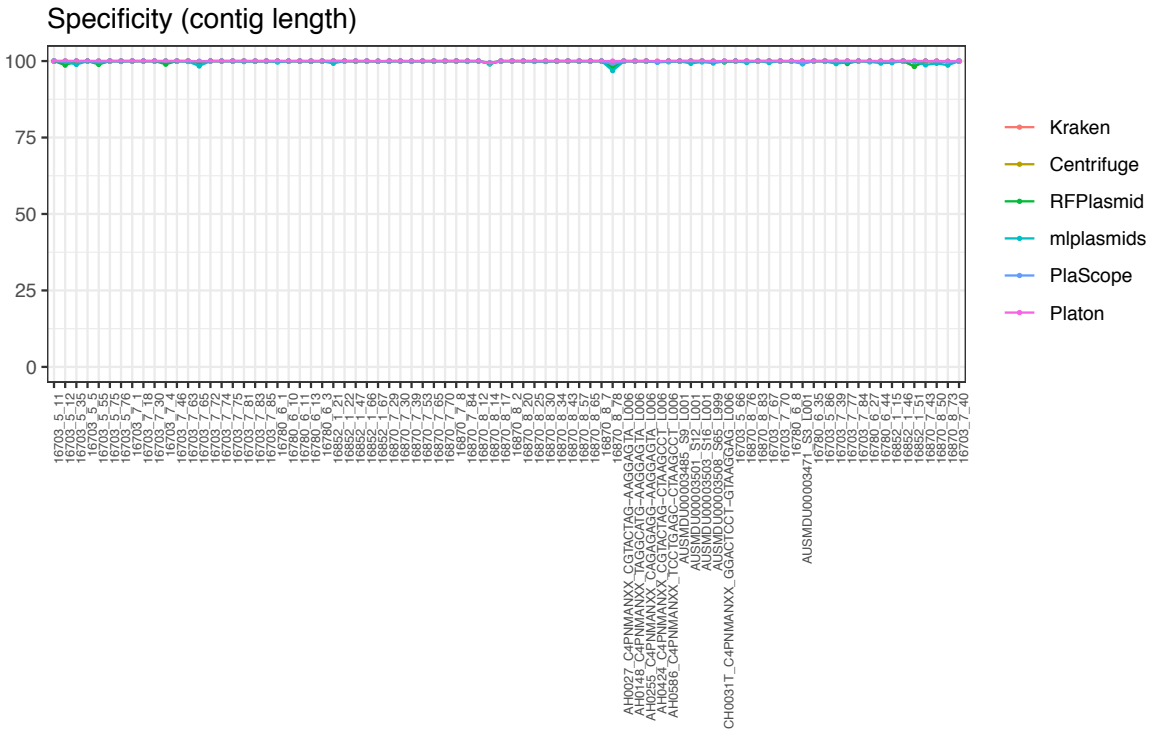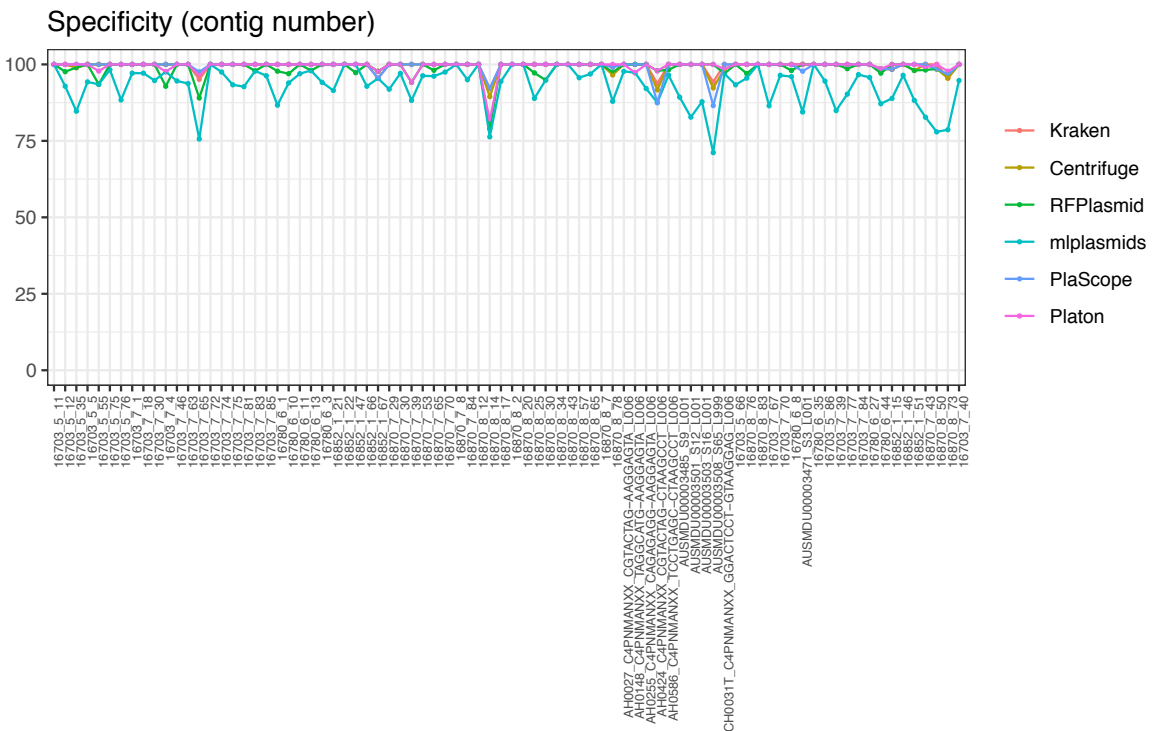

Precision (contig length)

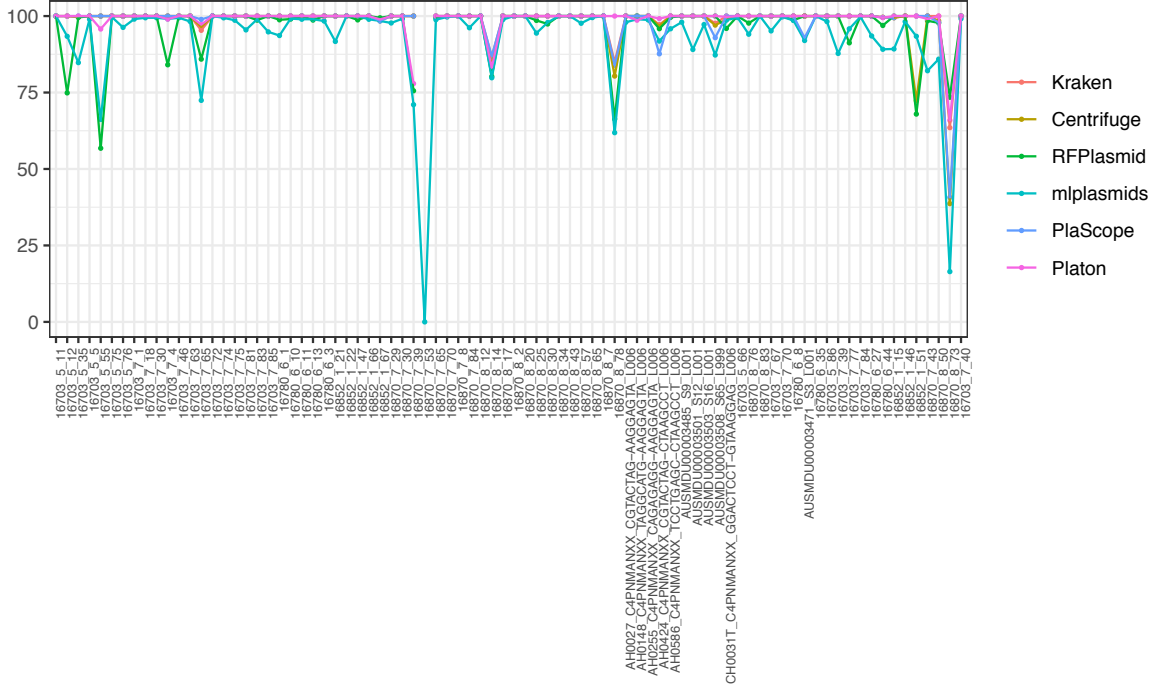

Precision (contig number)

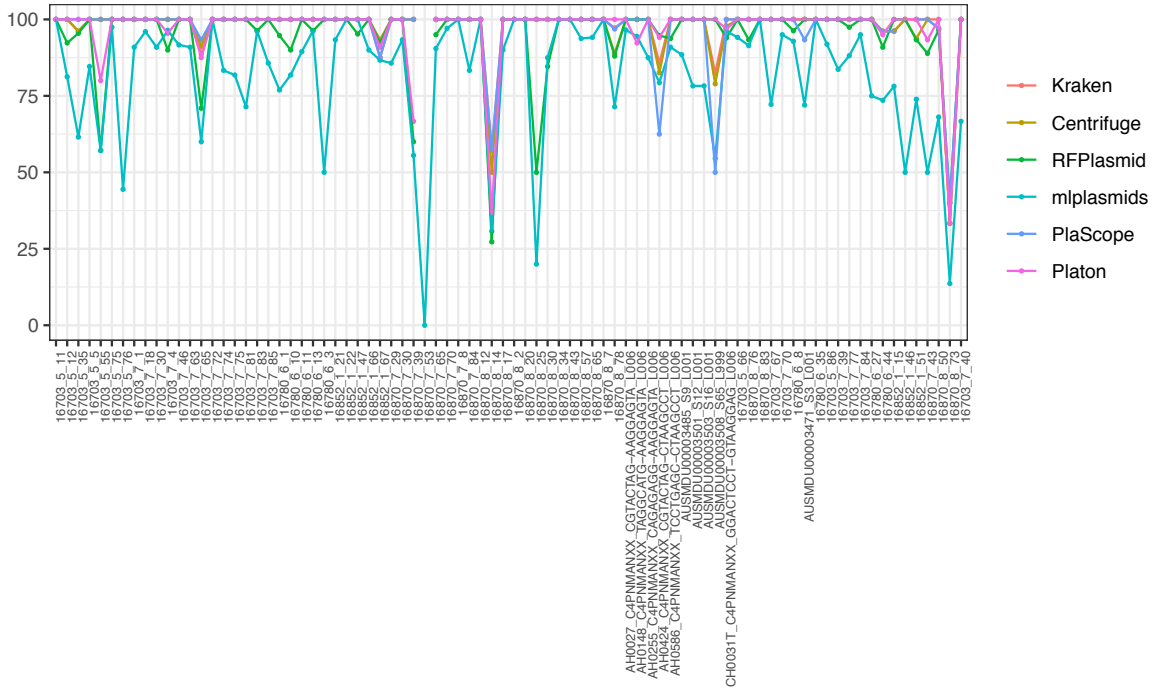

Negative predictive value (contig length)

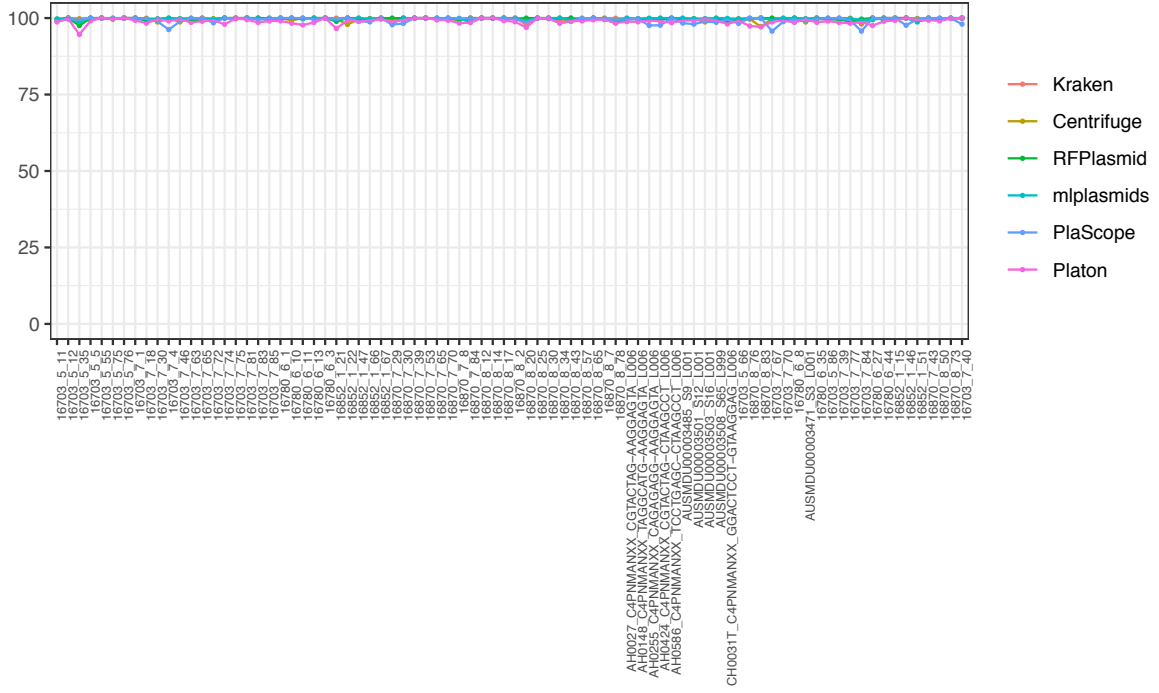

Negative predictive value (contig number)

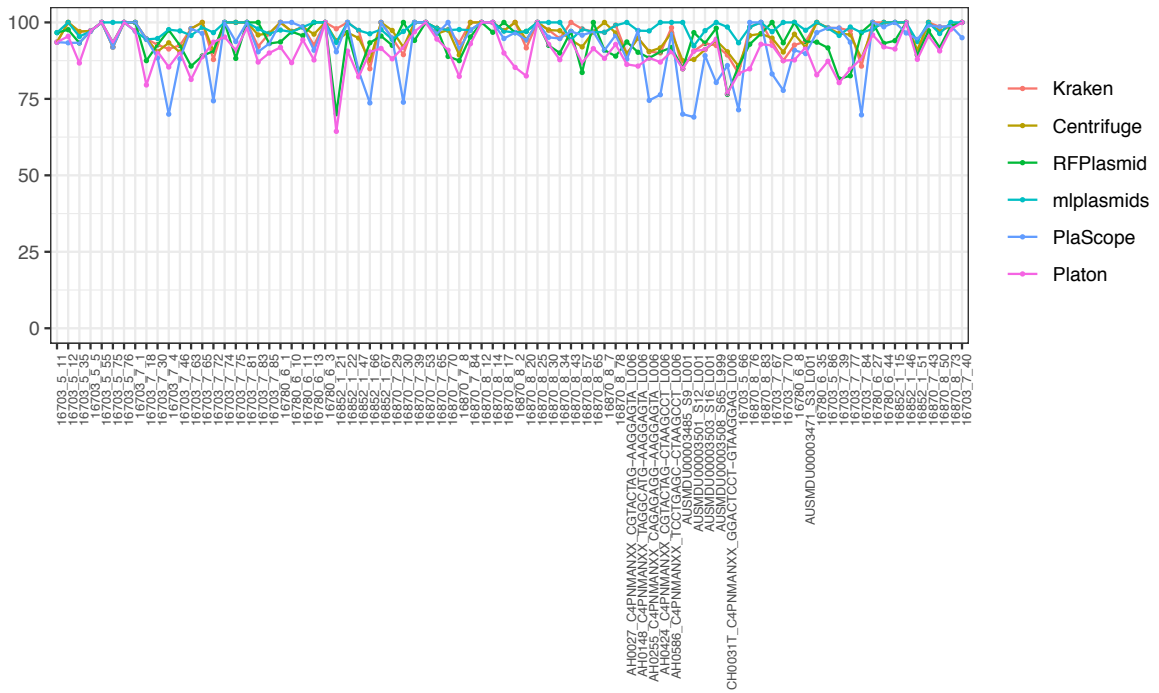

Accuracy (contig length)

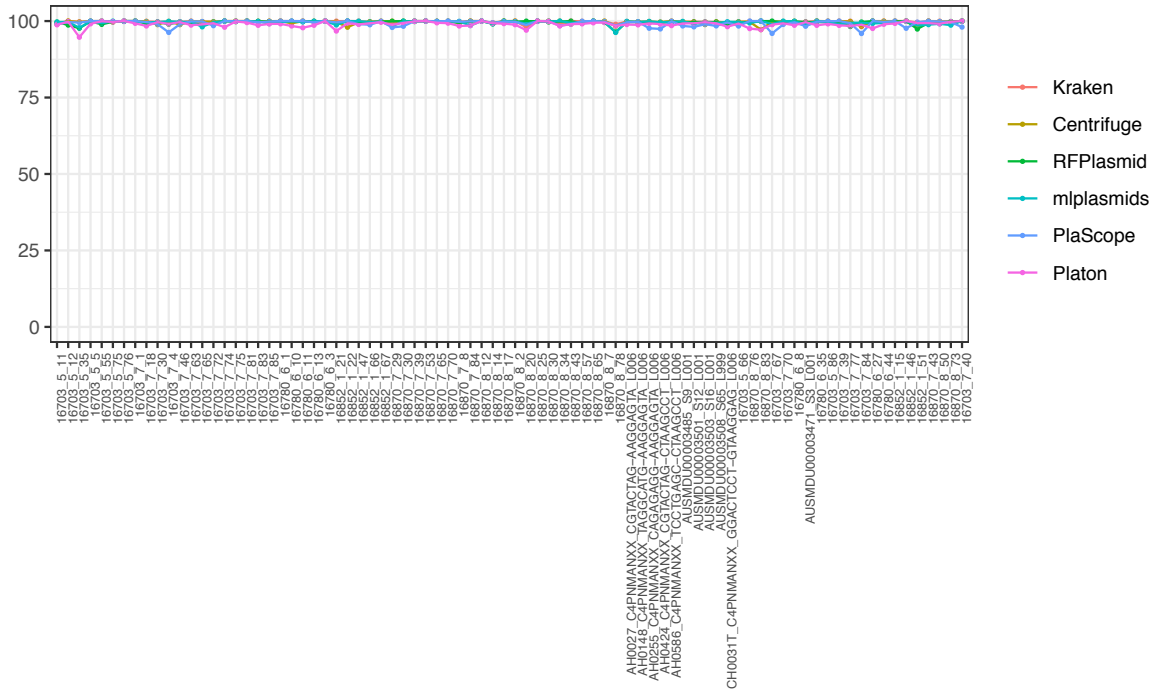

Accuracy (contig number)

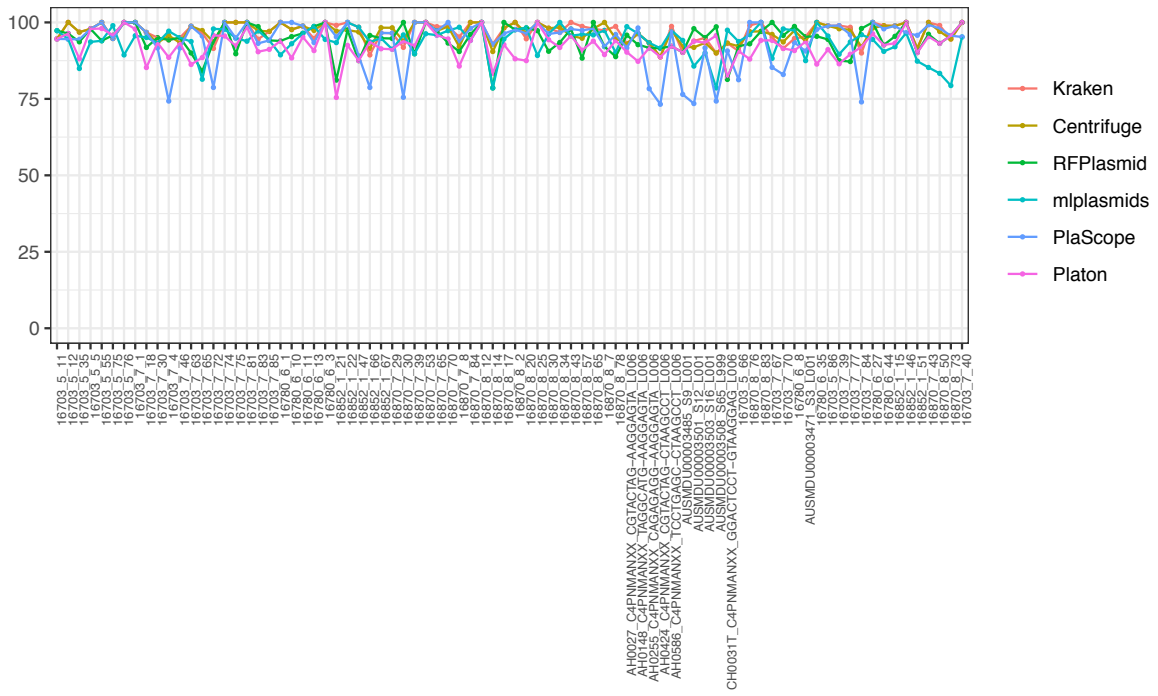

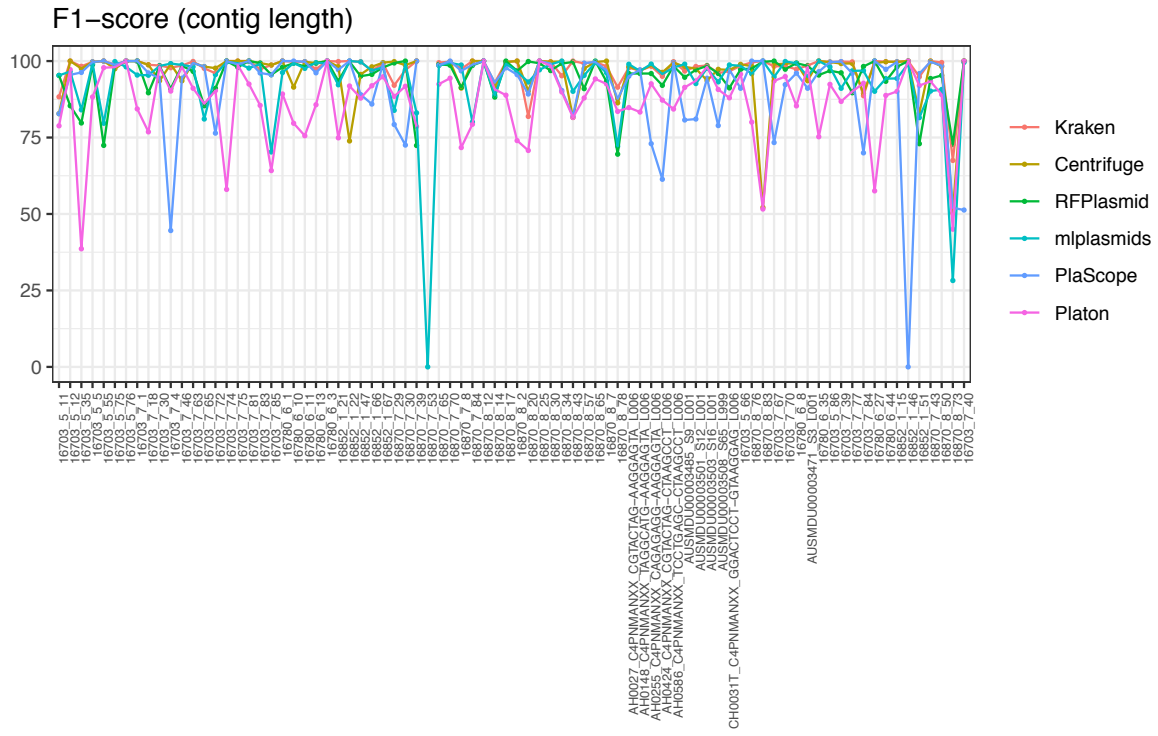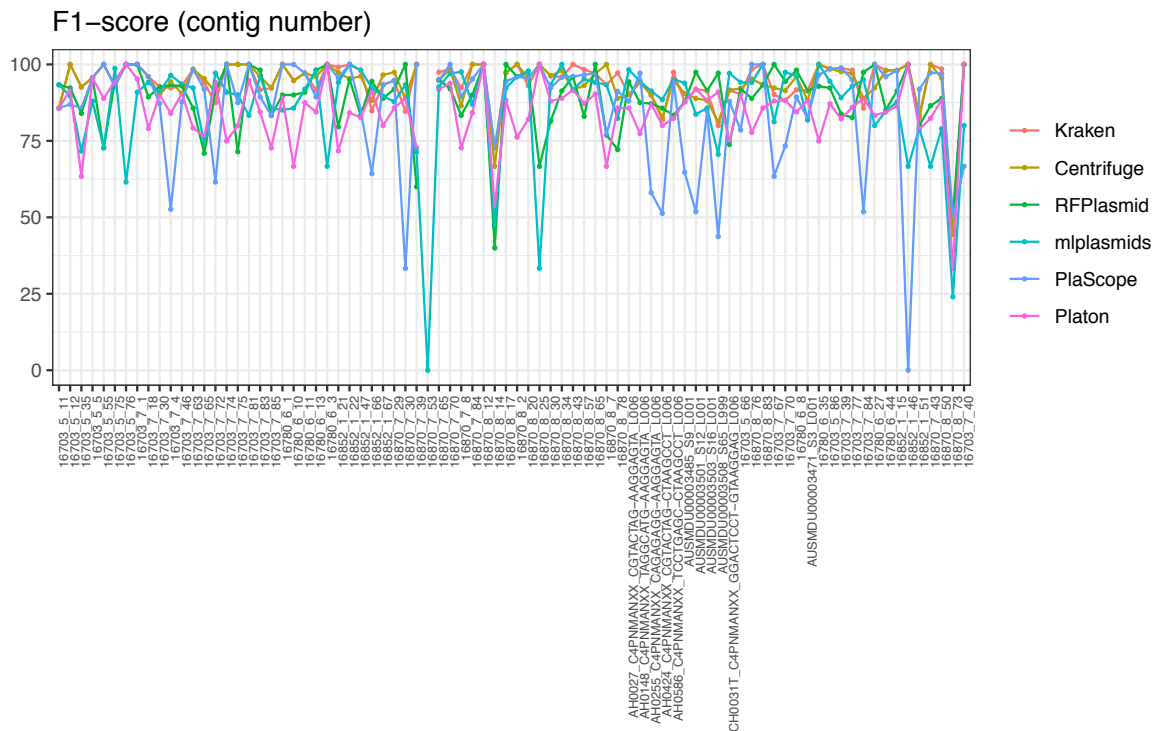

**Figure S3.** Performance metrics for Kraken, Centrifuge, RFPlasmid, mlplasmids, PlaScope, and Platon for each genome. Sensitivity, precision, and F1-score are not shown for 16870\_7\_53 except mlplasmids because this genome does not include plasmids and thus the true positive category is not applicable. (mlplasmids predicted one contig as plasmid-derived for this genome.)



## Kraken

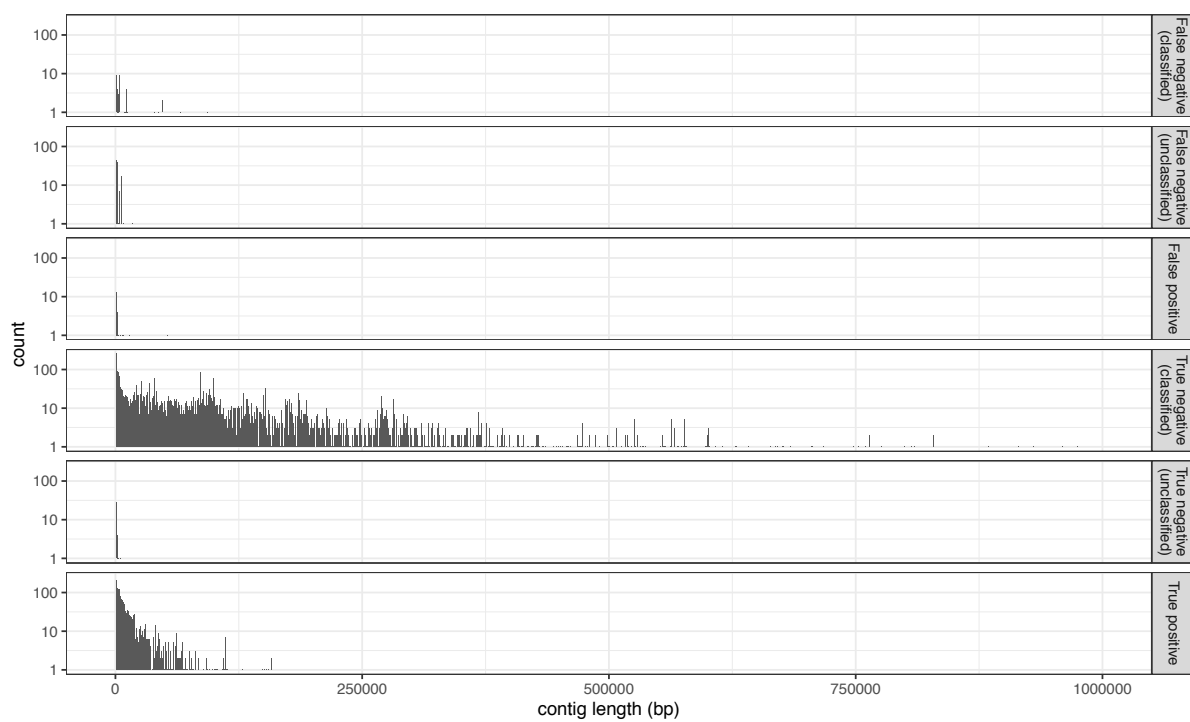

## Centrifuge

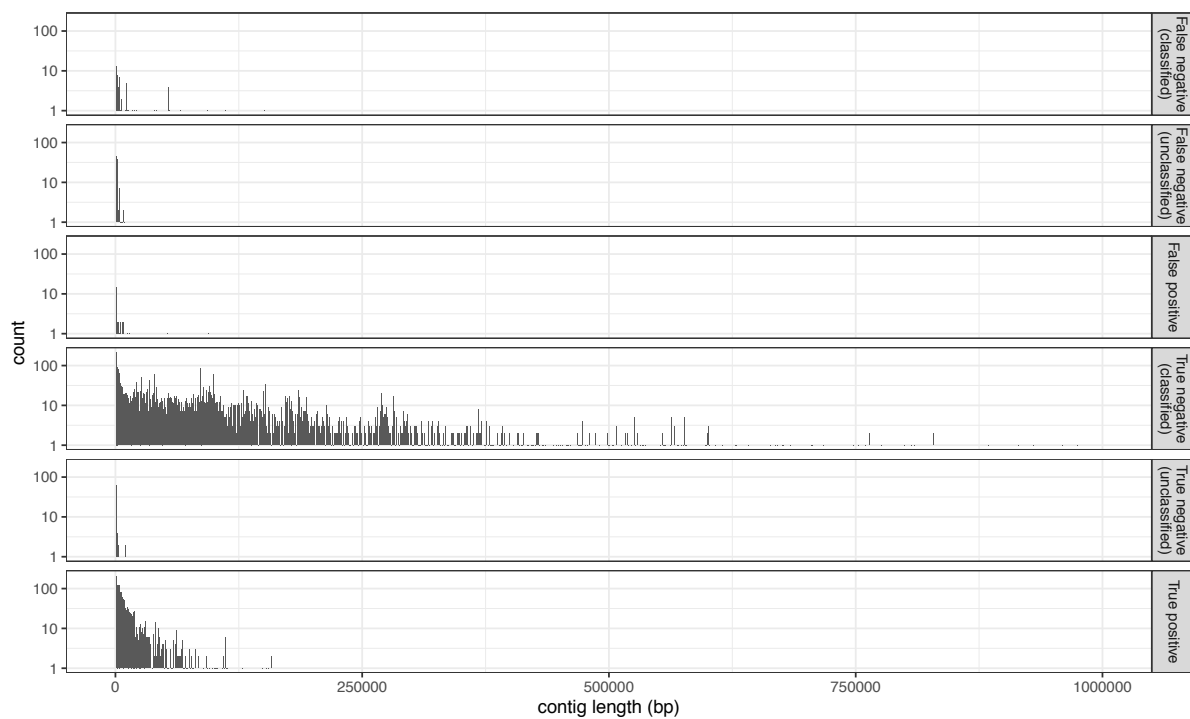

## RFPlasmid

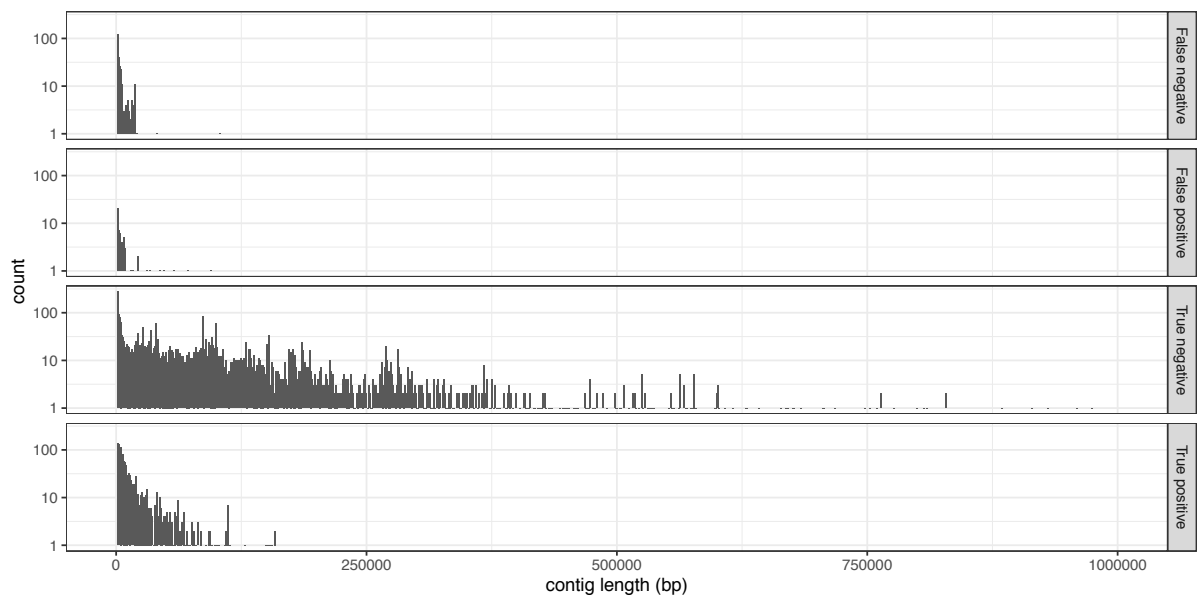

## mplasmids

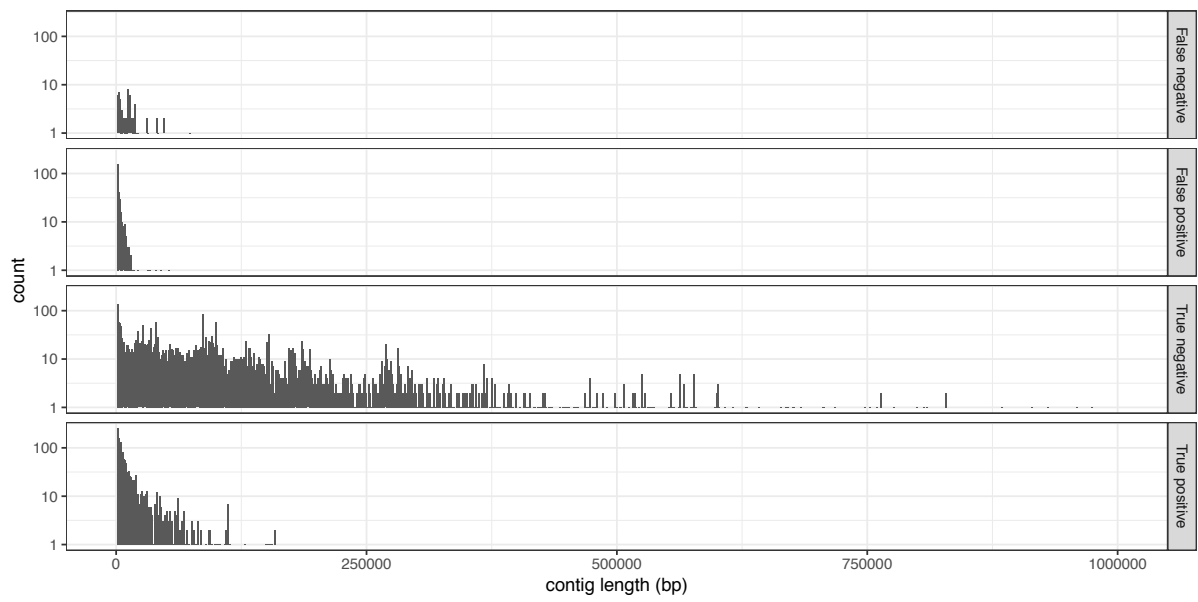

## PlaScope

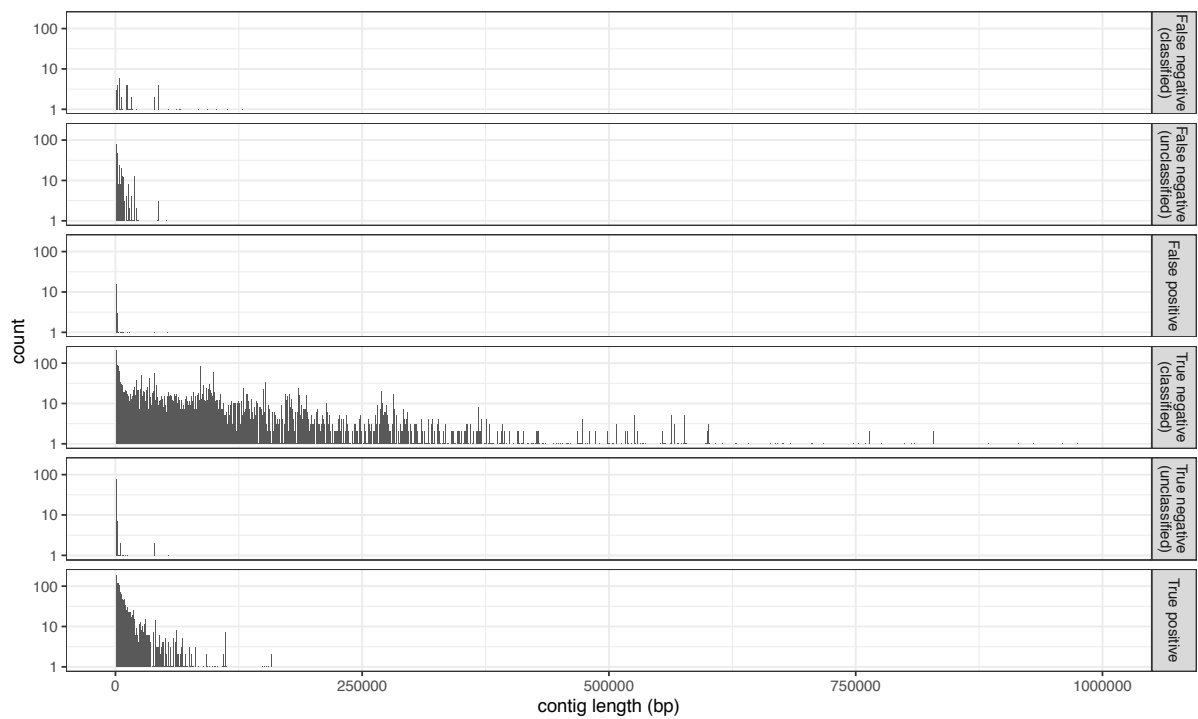

## Platon

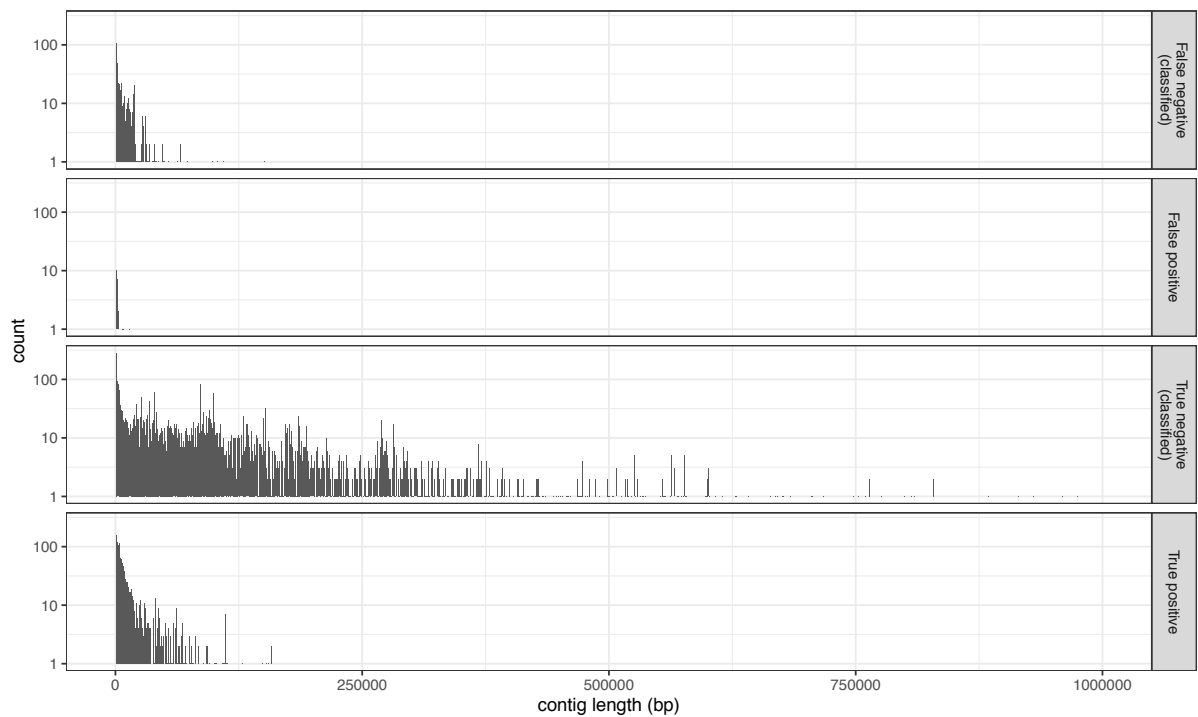

**Figure S4.** Relationships between contig length and classification categories. The y axes are on a log10 scale.

## **Supplementary Tables**

**Table S1.** See the excel file.

**Table S2.** See the excel file.

**Table S3.** Total contig sizes and contig counts assigned to each category.

|                                      | Kraken      | Centrifuge  | RFPlasmid   | mlplasmids  | PlaScope    | Platon      |
|--------------------------------------|-------------|-------------|-------------|-------------|-------------|-------------|
| <b>True positive</b>                 |             |             |             |             |             |             |
| Contig length (bp)                   | 22,223,924  | 21,776,743  | 21,692,165  | 22,104,317  | 20,080,424  | 18,472,253  |
| Contig count                         | 1,460       | 1,455       | 1,333       | 1,541       | 1,305       | 1,193       |
| <b>True negative (classified)</b>    |             |             |             |             |             |             |
| Contig length (bp)                   | 428,515,693 | 428,319,115 | 428,083,646 | 427,516,067 | 428,203,081 | 428,620,951 |
| Contig count                         | 3,640       | 3,595       | 3,640       | 3,394       | 3,573       | 3,675       |
| <b>True negative (unclassified)</b>  |             |             |             |             |             |             |
| Contig length (bp)                   | 54,468      | 115,685     | -           | -           | 306,627     | -           |
| Contig count                         | 34          | 72          | -           | -           | 96          | -           |
| <b>False positive</b>                |             |             |             |             |             |             |
| Contig length (bp)                   | 117,854     | 253,215     | 604,369     | 1,171,948   | 178,307     | 67,064      |
| Contig count                         | 23          | 30          | 57          | 303         | 28          | 22          |
| <b>False negative (classified)</b>   |             |             |             |             |             |             |
| Contig length (bp)                   | 486,738     | 1,025,913   | 1,336,170   | 924,018     | 1,297,404   | 4,556,082   |
| Contig count                         | 38          | 57          | 275         | 67          | 47          | 415         |
| <b>False negative (unclassified)</b> |             |             |             |             |             |             |
| Contig length (bp)                   | 317,673     | 225,679     | -           | -           | 1,650,507   | -           |
| Contig count                         | 110         | 96          | -           | -           | 256         | -           |

Kraken, Centrifuge, and PlaScope can label contigs as unclassified. As described in **Methods** section in the main text, these unclassified contigs were assigned to true negative if they were mapped to true chromosome or assigned to false negative if they were mapped to true plasmids.

**Table S4.** Consistency of performance between genomes in terms of interquartile range (IQR).

|                                             | Kraken                 | Centrifuge             | RFPlasmid        | mlplasmids             | PlaScope          | Platon            |
|---------------------------------------------|------------------------|------------------------|------------------|------------------------|-------------------|-------------------|
| <b>IQR of sensitivity (%)</b>               |                        |                        |                  |                        |                   |                   |
| Contig length                               | <b>4.27</b><br>(99.32) | 4.55<br>(98.38)        | 8.15<br>(96.51)  | 5.36<br>(99.05)        | 15.88<br>(94.08)  | 16.10<br>(81.91)  |
| Contig count                                | 15.38<br>(94.74)       | 14.71<br>(92.31)       | 17.22<br>(85.71) | <b>5.88</b><br>(96.30) | 23.07<br>(90.00)  | 12.84<br>(77.14)  |
| <b>IQR of specificity (%)</b>               |                        |                        |                  |                        |                   |                   |
| Contig length                               | <b>0</b><br>(100)      | <b>0</b><br>(100)      | 0.06<br>(100)    | 0.27<br>(99.93)        | <b>0</b><br>(100) | <b>0</b><br>(100) |
| Contig count                                | <b>0</b><br>(100)      | <b>0</b><br>(100)      | 1.99<br>(100)    | 8.27<br>(94.80)        | <b>0</b><br>(100) | <b>0</b><br>(100) |
| <b>IQR of precision (%)</b>                 |                        |                        |                  |                        |                   |                   |
| Contig length                               | <b>0</b><br>(100)      | <b>0</b><br>(100)      | 1.32<br>(100)    | 5.91<br>(98.39)        | <b>0</b><br>(100) | <b>0</b><br>(100) |
| Contig count                                | <b>0</b><br>(100)      | <b>0</b><br>(100)      | 5.00<br>(100)    | 21.57<br>(88.97)       | <b>0</b><br>(100) | <b>0</b><br>(100) |
| <b>IQR of negative predictive value (%)</b> |                        |                        |                  |                        |                   |                   |
| Contig length                               | 0.27<br>(99.96)        | <b>0.26</b><br>(99.91) | 0.42<br>(99.82)  | 0.27<br>(99.95)        | 1.10<br>(99.76)   | 0.93<br>(99.07)   |
| Contig count                                | 7.38<br>(97.53)        | 6.61<br>(96.64)        | 7.41<br>(93.89)  | <b>3.10</b><br>(97.85) | 8.65<br>(95.48)   | 7.25<br>(90.65)   |
| <b>IQR of accuracy (%)</b>                  |                        |                        |                  |                        |                   |                   |
| Contig length                               | <b>0.28</b><br>(99.95) | 0.29<br>(99.90)        | 0.42<br>(99.70)  | 0.55<br>(99.75)        | 1.01<br>(99.76)   | 0.87<br>(99.10)   |
| Contig count                                | 5.26<br>(98.04)        | <b>4.36</b><br>(97.36) | 5.74<br>(95.33)  | 5.61<br>(94.85)        | 6.56<br>(96.40)   | 5.17<br>(92.68)   |
| <b>IQR of F1-score (%)</b>                  |                        |                        |                  |                        |                   |                   |
| Contig length                               | 2.60<br>(99.48)        | <b>2.53</b><br>(99.01) | 5.03<br>(97.60)  | 5.63<br>(97.37)        | 9.33<br>(96.79)   | 9.99<br>(90.06)   |
| Contig count                                | 8.33<br>(96.30)        | <b>7.08</b><br>(95.52) | 12.00<br>(91.43) | 11.75<br>(91.78)       | 12.45<br>(94.44)  | 10.32<br>(86.02)  |

Median values are shown in parentheses. Bold font indicates the lowest IQR and highest median value(s) in each category.

**Table S5.** Wilcoxon signed-rank test results (p-values) for Kraken vs other methods.

|                                  | Centrifuge | RFPlasmid        | mlplasmids       | PlaScope         | Platon           |
|----------------------------------|------------|------------------|------------------|------------------|------------------|
| <b>Sensitivity</b>               |            |                  |                  |                  |                  |
| Contig length                    | 1.000      | <b>&lt;0.001</b> | 1.000            | <b>&lt;0.001</b> | <b>&lt;0.001</b> |
| Contig count                     | 1.000      | <b>0.00350</b>   | <b>&lt;0.001</b> | <b>&lt;0.001</b> | <b>&lt;0.001</b> |
| <b>Specificity</b>               |            |                  |                  |                  |                  |
| Contig length                    | 0.137      | <b>&lt;0.001</b> | <b>&lt;0.001</b> | 1.000            | 1.000            |
| Contig count                     | 0.488      | <b>0.00327</b>   | <b>&lt;0.001</b> | 1.000            | 1.000            |
| <b>Precision</b>                 |            |                  |                  |                  |                  |
| Contig length                    | 0.122      | <b>&lt;0.001</b> | <b>&lt;0.001</b> | 0.527            | 1.000            |
| Contig count                     | 0.488      | <b>0.00430</b>   | <b>&lt;0.001</b> | 1.000            | 1.000            |
| <b>Negative predictive value</b> |            |                  |                  |                  |                  |
| Contig length                    | 1.000      | <b>&lt;0.001</b> | 1.000            | <b>&lt;0.001</b> | <b>&lt;0.001</b> |
| Contig count                     | 1.000      | <b>0.0262</b>    | <b>0.00468</b>   | <b>&lt;0.001</b> | <b>&lt;0.001</b> |
| <b>Accuracy</b>                  |            |                  |                  |                  |                  |
| Contig length                    | 0.458      | <b>&lt;0.001</b> | <b>&lt;0.001</b> | <b>&lt;0.001</b> | <b>&lt;0.001</b> |
| Contig count                     | 1.000      | <b>0.00191</b>   | <b>&lt;0.001</b> | <b>&lt;0.001</b> | <b>&lt;0.001</b> |
| <b>F1-score</b>                  |            |                  |                  |                  |                  |
| Contig length                    | 0.495      | <b>&lt;0.001</b> | <b>&lt;0.001</b> | <b>&lt;0.001</b> | <b>&lt;0.001</b> |
| Contig count                     | 1.000      | <b>&lt;0.001</b> | <b>&lt;0.001</b> | <b>&lt;0.001</b> | <b>&lt;0.001</b> |

Wilcoxon signed-rank test was performed for each metric using values shown in **Figure 1** and **Figure S3**. Bonferroni correction was applied across each row. p-values < 0.05 are shown in bold.

**Table S6.** Performance of Centrifuge using the database created without excluding chromosomal sequences containing integrated plasmid sequences.

|                                          | Contig length   | Contig count    |
|------------------------------------------|-----------------|-----------------|
| Sensitivity (true positive rate, %)      | 80.030 (94.565) | 78.109 (90.485) |
| Specificity (true negative rate, %)      | 99.943 (99.941) | 99.216 (99.189) |
| Precision (positive predictive value, %) | 98.685 (98.851) | 97.743 (97.980) |
| Negative predictive value (%)            | 98.938 (99.709) | 91.244 (95.995) |
| Accuracy (%)                             | 98.928 (99.667) | 92.818 (96.550) |
| F1-score (%)                             | 88.384 (96.660) | 86.830 (94.083) |

Values in **Table 2** i.e. those calculated when excluding chromosomes with integrated plasmids are shown in parentheses for comparison purposes.

**Table S7.** Performance of mlplasmids for *K. pneumoniae* genomes (n=69).

|                                          | Contig length | Contig count |
|------------------------------------------|---------------|--------------|
| Sensitivity (true positive rate, %)      | 96.158        | 95.761       |
| Specificity (true negative rate, %)      | 99.771        | 93.032       |
| Precision (positive predictive value, %) | 95.770        | 86.054       |
| Negative predictive value (%)            | 99.792        | 97.995       |
| Accuracy (%)                             | 99.585        | 93.878       |
| F1-score (%)                             | 95.963        | 90.649       |

**Table S8.** mlplasmids performance with a requirement of a minimum posterior probability of 0.7 for classification.

|                                          | Contig length | Contig count |
|------------------------------------------|---------------|--------------|
| Sensitivity (true positive rate, %)      | 90.241        | 78.794       |
| Specificity (true negative rate, %)      | 99.882        | 98.323       |
| Precision (positive predictive value, %) | 97.618        | 95.335       |
| Negative predictive value (%)            | 99.478        | 91.424       |
| Accuracy (%)                             | 99.390        | 92.403       |
| F1-score (%)                             | 93.785        | 86.279       |



**Table S9.** Performance metrics of Kraken in the cross validation analysis.

|                                                 | Group A | Group B | Group C | Overall | Base database* |
|-------------------------------------------------|---------|---------|---------|---------|----------------|
| <b>Sensitivity (true positive rate, %)</b>      |         |         |         |         |                |
| Contig length                                   | 96.699  | 97.107  | 98.861  | 97.547  | 96.507         |
| Contig count                                    | 89.984  | 89.883  | 92.784  | 90.796  | 90.796         |
| <b>Specificity (true negative rate, %)</b>      |         |         |         |         |                |
| Contig length                                   | 99.952  | 99.996  | 99.975  | 99.975  | 99.973         |
| Contig count                                    | 99.584  | 99.718  | 99.497  | 99.594  | 99.378         |
| <b>Precision (positive predictive value, %)</b> |         |         |         |         |                |
| Contig length                                   | 99.103  | 99.934  | 99.505  | 99.517  | 99.472         |
| Contig count                                    | 98.917  | 99.355  | 98.684  | 98.983  | 98.449         |
| <b>Negative predictive value (%)</b>            |         |         |         |         |                |
| Contig length                                   | 99.820  | 99.839  | 99.942  | 99.868  | 99.813         |
| Contig count                                    | 95.922  | 95.320  | 97.138  | 96.136  | 96.128         |
| <b>Accuracy (%)</b>                             |         |         |         |         |                |
| Contig length                                   | 99.784  | 99.844  | 99.921  | 99.851  | 99.796         |
| Contig count                                    | 96.732  | 96.510  | 97.558  | 96.927  | 96.777         |
| <b>F1-score (%)</b>                             |         |         |         |         |                |
| Contig length                                   | 97.886  | 98.500  | 99.182  | 98.522  | 97.967         |
| Contig count                                    | 94.239  | 94.382  | 95.643  | 94.713  | 94.468         |

\*Values in this column are from **Table 2** and shown for comparison purposes.

**Table S10.** See the excel file.

## Supplementary Methods

### Commands used for running Kraken.

1. Download the NCBI taxonomy.

```
kraken-build --download-taxonomy --db database
```

2. Add genomes to the library.

```
for file in reference/*.fasta; do
```

```
    kraken-build --add-to-library ${file} --db database
```

```
done
```

#Note that taxonomy information was added to the headers of fasta files. For example, the fasta file of *K. pneumoniae* chromosome NZ\_CP026130.1 begins with ">NZ\_CP026130.1|kraken:taxid|573", the fasta file of *K. variicola* subsp. *variicola* chromosome NZ\_CP020847.1 begins with ">NZ\_CP020847.1|kraken:taxid|2590157", and the fasta file of plasmid AP014611 begins with ">AP014611.1|kraken:taxid|36549".

3. Build the database.

```
kraken-build --build --db database
```

4. Classify sequences.

```
for file in assemblies/*.fasta; do
```

```
    kraken --preload --db database ${file} > $(basename ${file}.fasta)_output.txt
```

```
done
```

### Commands used for running Centrifuge.

1. Build the database.

```
centrifuge-build -p 10 --conversion-table seqid_to_taxid.map --taxonomy-tree nodes.dmp --name-table names.dmp database.fna chromosome_plasmid_db
```

#Note that the corresponding line in the nodes.dmp file was modified as follows:

```
from
```

```
36549 | 28384 | no rank || 0 | 0 | 11 | 1 | 0 | 1 | 0 | 0 ||
```

```
to
```

```
36549 | 28384 | species || 0 | 0 | 11 | 1 | 0 | 1 | 0 | 0 ||
```

2. Classify sequences.

```
for file in assemblies/*.fasta; do
```

```
    centrifuge -f -p 10 --reorder -x chromosome_plasmid_db -U ${file} -k 1 --report-file $(basename ${file}.fasta)_summary.txt -S $(basename ${file}.fasta)_output.txt
```

done

Commands used for running RFPlasmid.

```
python3 rfplasmid.py --species Enterobacteriaceae --input assemblies/ --jelly --threads 8 --out  
output_directory
```

R commands used for running mlplasmids.

```
plasmid_classification(path_input_file = fasta_file, full_output = TRUE, species = "Klebsiella  
pneumoniae")
```

Commands used for running PlaScope.

```
plaScope.sh --fasta my_fastafile.fasta -o output_directory --db_dir path/to/DB --db_name  
Klebsiella_PlaScope --sample name_of_my_sample
```

Commands used for running Platon.

```
platon --db path/to/DB --threads 10 --output results/ my_fastafile.fasta
```
